# Supplementary material for: Calcium phosphate nanoparticles: colloidally stabilized and made fluorescent by a phosphate-functionalized porphyrin
Source: Royal Society of Chemistry journal article supplement (doi:10.1039/b805366a), 2008-01-01
Supplement: b805366a.pdf [file b805366a.pdf]

## Supplementary Material

### Calcium phosphate nanoparticles: Colloidally stabilized and made fluorescing by a phosphate-functionalized porphyrin

by

Kathirvel Ganesan,<sup>1</sup> Anna Kovtun,<sup>1</sup> Sebastian Neumann,<sup>2</sup> Rolf Heumann,<sup>2</sup> and Matthias Epple<sup>1,\*</sup>

<sup>1</sup> Institute of Inorganic Chemistry and Center for Nanointegration Duisburg-Essen (CeNIDE), University of Duisburg-Essen, Universitaetsstrasse 5-7, 45117 Essen, Germany, email: matthias.epple@uni-due.de

<sup>2</sup> Chair of Biochemistry, Molecular Neurobiochemistry, University of Bochum, Universitaetsstrasse 150, D-44780 Bochum, Germany

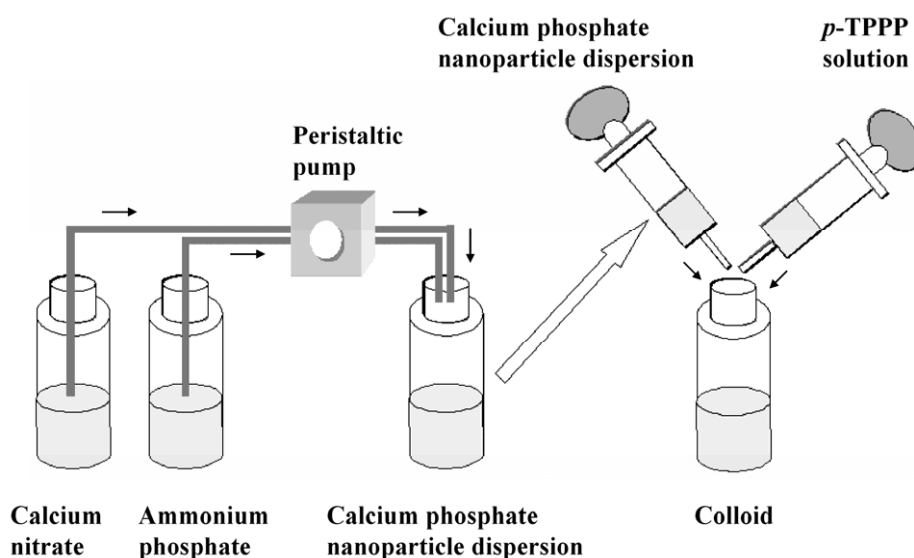

**Figure S1:** Schematic diagram of the preparation of *p*-TPPP-functionalized calcium phosphate nanoparticles.

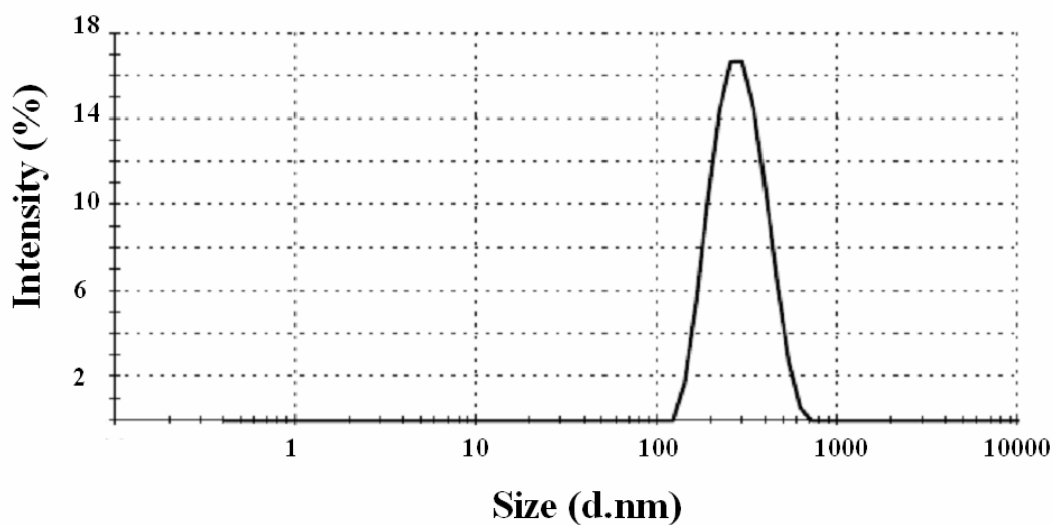

**Figure S2:** Size distribution data of the redispersed nanoparticles at pH 7.4 from dynamic light scattering.

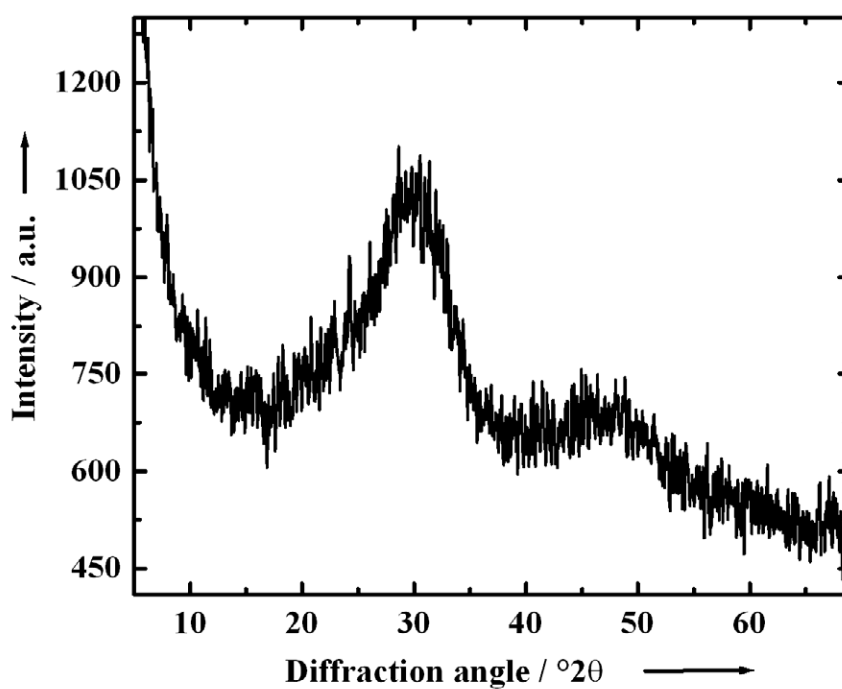

**Figure S3:** XRD data of the functionalized nanoparticles. The broad peaks indicate a very low crystalline order.
